# Supplementary material for: Two organelle RNA recognition motif proteins affect distinct sets of RNA editing sites in the Arabidopsis thaliana plastid
Source: PubMed Central journal article supplement (PMC7132558; doi:10.1002/pld3.213), 2020-04-06
Supplement: PLD3-4-e00213-s001.pdf [file PLD3-4-e00213-s001.pdf]

**Table S1.** Primers used in this study

| Primer                | Sequence                            | Use                                                     |
|-----------------------|-------------------------------------|---------------------------------------------------------|
| SALK_072648LP         | TCACATTTCAAGATTGATGTTTGAC           | Left genomic primer for <i>orrm1-1</i>                  |
| SALK_072648RP         | AACCCGAAATGGGTATCAAAG               | Right genomic primer for <i>orrm1-2</i>                 |
| LBa1                  | TGGTTCACGTAGTGGGCCATCG              | Left border primer for SALK lines                       |
| SAIL_763_A05LP        | AAAATGCAGATTAGGCGGTG                | Left genomic primer for <i>orrm6-1</i>                  |
| SAIL_763_A05RP        | CAAAAAGGTTGCAGAAAGCTG               | Right genomic primer for <i>orrm6-1</i>                 |
| LB3                   | TAGCATCTGAATTTTCATAACCAATCTCGATACAC | Left border primer for SAIL lines                       |
| WiscDsLox485-488P23LP | GGAAAGCAAACCTTTTGGTC                | Left genomic primer for <i>orrm6-2</i>                  |
| WiscDsLox485-488P23RP | AGTTTAAGGGGATAGGGGTCC               | Right genomic primer for <i>orrm6-2</i>                 |
| p745                  | AACGTCCGCAATGTGTTATTAAGTTGTC        | Left border primer for WiscDsLox lines                  |
| accD_1_F              | TTCATTTGTAGTGAAAGCGG                | Forward primer for <i>accD-C794</i>                     |
| accD_1_R              | TTTCGCCTACTACGGATCCC                | Reverse primer for <i>accD-C794</i>                     |
| accD_2_F              | CTACTACCGGTGGAGTGACAGC              | Forward primer for <i>accD-C1568</i>                    |
| accD_2_R              | AGAATCTGATCTAACAACAGGGAA            | Reverse primer for <i>accD-C1568</i>                    |
| atpF_1_F              | GAGTTTCGGATTTAATACCG                | Forward primer for <i>atpF-C92</i>                      |
| atpF_1_R              | AGTCCTTGTAAGCTTGTTG                 | Reverse primer for <i>atpF-C92</i>                      |
| clpP_1_F              | TTGGGTTGACATATACAACCG               | Forward primer for <i>clpP-C559</i>                     |
| clpP_1_R              | TGAACCGCTACAAGATCAAC                | Reverse primer for <i>clpP-C559</i>                     |
| matK_2_F              | CGTTACCGGGTAAAAGATGC                | Forward primer for <i>matK-C640</i>                     |
| matK_2_R              | AGCGGCGTATCCTTTGTTGC                | Reverse primer for <i>matK-C640</i>                     |
| ndhB_1-3_F            | TTTGCTTCTCTTCGATGGAAG               | Forward primer for three <i>ndhB</i> sites              |
| ndhB_1-3_R            | ACGACTGGAGTGGGAGATCCTTC             | Reverse primer for three <i>ndhB</i> sites              |
| ndhB_7-12_F           | CGTATACGAAGGATCTCCAC                | Forward primer for six <i>ndhB</i> sites                |
| ndhB_7-12_R           | CCTGAGCAATCGCAATAATCG               | Reverse primer for six <i>ndhB</i> sites                |
| ndhD_1-5_F            | TTGAGTACGCGTTCTTTGGAC               | Forward primer for five <i>ndhD</i> sites               |
| ndhD_1-5_R            | AATAGCTCCATTAAGTCCAGG               | Reverse primer for five <i>ndhD</i> sites               |
| ndhF_2_F              | AAAACCTTCGCCGCATGTGG                | Forward primer for <i>ndhF-C290</i>                     |
| ndhF_2_R              | GCATTCGCTGCAATAGGTCG                | Reverse primer for <i>ndhF-C290</i>                     |
| ndhG_1_F              | ATGGATTTGCCTGGACCAATAC              | Forward primer for <i>ndhG-C50</i>                      |
| ndhG_1_R              | TTGATAAATGAATTCCTATTTGTTG           | Reverse primer for <i>ndhG-C50</i>                      |
| petL_2_F              | AAATTTGGTAATTAACACGG                | Forward primer for <i>petL-C5</i>                       |
| petL_2_R              | ATTTCAATTGAACTTAGGG                 | Reverse primer for <i>petL-C5</i>                       |
| psbE_1_psbF_1_F       | ACAGGAGAACGTTCTTTTGC                | Forward primer for <i>psbE-C214</i> and <i>psbF-C77</i> |
| psbE_1_psbF_1_R       | ATATAATCCATCCGAATGGG                | Reverse primer for <i>psbE-C214</i> and <i>psbF-C77</i> |
| psbZ_1_F              | ATGAGATACGCGATCCAGTATAC             | Forward primer for <i>psbZ-C50</i>                      |
| psbZ_1_R              | TCAAGAGATAAGAGAATTAAGGATAC          | Reverse primer for <i>psbZ-C50</i>                      |
| rpl23_1_F             | AAGAGGTGGAATAGAATAACCCG             | Forward primer for <i>rpl23-C89</i>                     |
| rpl23_1_R             | CAATTCCTACTGGATGCACGC               | Reverse primer for <i>rpl23-C89</i>                     |
| rpoA_1_F              | GTAAGCGTCTTTATTATGGACGC             | Forward primer for <i>rpoA-C200</i>                     |
| rpoA_1_R              | CTTGATGAAGTGCTTCTTTAGGAG            | Reverse primer for <i>rpoA-C200</i>                     |
| rpoB_1_3_F            | GAAAACCAGTAGGAATATGC                | Forward primer for two <i>rpoB</i> sites                |
| rpoB_1_3_R            | GTCTCCAATTAATATTTTCGGCG             | Reverse primer for two <i>rpoB</i> sites                |
| rpoB_7_F              | GAGGTGGGTTTCAGAAAAAGG               | Forward primer for <i>rpoB-C2432</i>                    |
| rpoB_7_R              | TATCTGTCCTACATTCATGCG               | Reverse primer for <i>rpoB-C2432</i>                    |
| rpoC1_1_F             | AGTTTTGTGAACAATGTGGAGTTG            | Forward primer for <i>rpoC1-C488</i>                    |
| rpoC1_1_R             | TGAATGATGGGTCTCAACTCGG              | Reverse primer for <i>rpoC1-C488</i>                    |
| rps12_1_F             | CTTGTACAATTCACATTCTTTGGC            | Forward primer for <i>rps12</i> -intron                 |
| rps12_1_R             | ACAAGACAGCCAATCCGAAAC               | Reverse primer for <i>rps12</i> -intron                 |
| rps14_1-2_F           | TTATAGGGAGAAGAAGAGGC                | Forward primer for two <i>rps14</i> sites               |
| rps14_1-2_R           | TACCAGCTTGATCTTGTTGC                | Reverse primer for two <i>rps14</i> sites               |
