# Supplementary material for: Two organelle RNA recognition motif proteins affect distinct sets of RNA editing sites in the Arabidopsis thaliana plastid
Source: PubMed Central journal article supplement (PMC7132558; doi:10.1002/pld3.213), 2020-04-06
Supplement: PLD3-4-e00213-s002.pdf [file PLD3-4-e00213-s002.pdf]

**Table S2.** Functions of transcripts edited in the Arabidopsis plastid. PE – partially edited (<50%) in the wild type.

| Gene function                                                 | Biological process                | Gene abbreviation   | Edited nucleotide      | Affected in |
|---------------------------------------------------------------|-----------------------------------|---------------------|------------------------|-------------|
| $\beta$ subunit of acetyl-CoA carboxylase                     | Fatty acid synthesis              | <i>accD</i>         | C794                   | <i>orm6</i> |
|                                                               |                                   | <i>accD</i>         | C1568                  | <i>orm1</i> |
| F subunit of ATP synthase                                     | Photophosphorylation              | <i>atpF</i>         | C92                    |             |
| Caseinolytic protease P1                                      | Protein quality control           | <i>clpP</i>         | C559                   | <i>orm1</i> |
| Maturase K                                                    | RNA splicing                      | <i>matK</i>         | C706                   | <i>orm1</i> |
| B subunit of NADH dehydrogenase                               | Cyclic electron flow              | <i>ndhB</i>         | C149                   |             |
|                                                               |                                   | <i>ndhB</i>         | C467                   | <i>orm1</i> |
|                                                               |                                   | <i>ndhB</i>         | C586                   | <i>orm1</i> |
|                                                               |                                   | <i>ndhB</i>         | C746                   | <i>orm1</i> |
|                                                               |                                   | <i>ndhB</i>         | C830                   | <i>orm1</i> |
|                                                               |                                   | <i>ndhB</i>         | C836                   | <i>orm1</i> |
|                                                               |                                   | <i>ndhB</i>         | C872                   | <i>orm1</i> |
|                                                               |                                   | <i>ndhB</i>         | C1255                  | <i>orm1</i> |
|                                                               |                                   | <i>ndhB</i>         | C1481                  |             |
| D subunit of NADH dehydrogenase                               | Cyclic electron flow              | <i>ndhD</i>         | C2 <sup>PE</sup>       | <i>orm1</i> |
|                                                               |                                   | <i>ndhD</i>         | C383                   |             |
|                                                               |                                   | <i>ndhD</i>         | C674                   | <i>orm1</i> |
|                                                               |                                   | <i>ndhD</i>         | C878                   | <i>orm1</i> |
|                                                               |                                   | <i>ndhD</i>         | C887                   | <i>orm1</i> |
| F subunit of NADH dehydrogenase                               | Cyclic electron flow              | <i>ndhF</i>         | C290 <sup>PE</sup>     |             |
| G subunit of NADH dehydrogenase                               | Cyclic electron flow              | <i>ndhG</i>         | C50                    | <i>orm1</i> |
| L subunit of cytochrome <i>b<sub>6</sub>f</i>                 | Photosynthetic electron transport | <i>petL</i>         | C5 <sup>PE</sup>       |             |
| $\alpha$ subunit of cytochrome <i>b<sub>559</sub></i> in PSII | Photosynthetic electron transport | <i>psbE</i>         | C214                   |             |
| $\beta$ subunit of cytochrome <i>b<sub>559</sub></i> in PSII  | Photosynthetic electron transport | <i>psbF</i>         | C77                    | <i>orm6</i> |
| Z subunit of PSII                                             | Photosynthetic electron transport | <i>psbZ</i>         | C50                    |             |
| Ribosomal protein L23                                         | Translation                       | <i>rpl23</i>        | C89                    |             |
| $\alpha$ subunit of RNA polymerase                            | Transcription                     | <i>rpoA</i>         | C200                   | <i>orm1</i> |
| $\beta$ subunit of RNA polymerase                             | Transcription                     | <i>rpoB</i>         | C338                   | <i>orm1</i> |
|                                                               |                                   | <i>rpoB</i>         | C551 <sup>PE</sup>     | <i>orm1</i> |
|                                                               |                                   | <i>rpoB</i>         | C2432                  | <i>orm1</i> |
| $\beta'$ subunit of RNA polymerase                            | Transcription                     | <i>rpoC1</i>        | C488 <sup>PE</sup>     |             |
| Ribosomal protein S12                                         | Translation                       | <i>rps12-intron</i> | C(i1 58) <sup>PE</sup> | <i>orm1</i> |
| Ribosomal protein S14                                         | Translation                       | <i>rps14</i>        | C80                    |             |
|                                                               |                                   | <i>rps14</i>        | C149                   | <i>orm1</i> |
